# Supplementary material for: Association between admission anemia and long-term mortality in patients with acute myocardial infarction: results from the MONICA/KORA myocardial infarction registry
Source: Springer Nature journal article supplement (doi:10.1186/s12872-018-0785-5), 2018-03-09
Supplement: MOESM1 [file 12872_2018_785_MOESM1_ESM.pdf › 12872_2018_785_MOESM1_ESM.pdf]

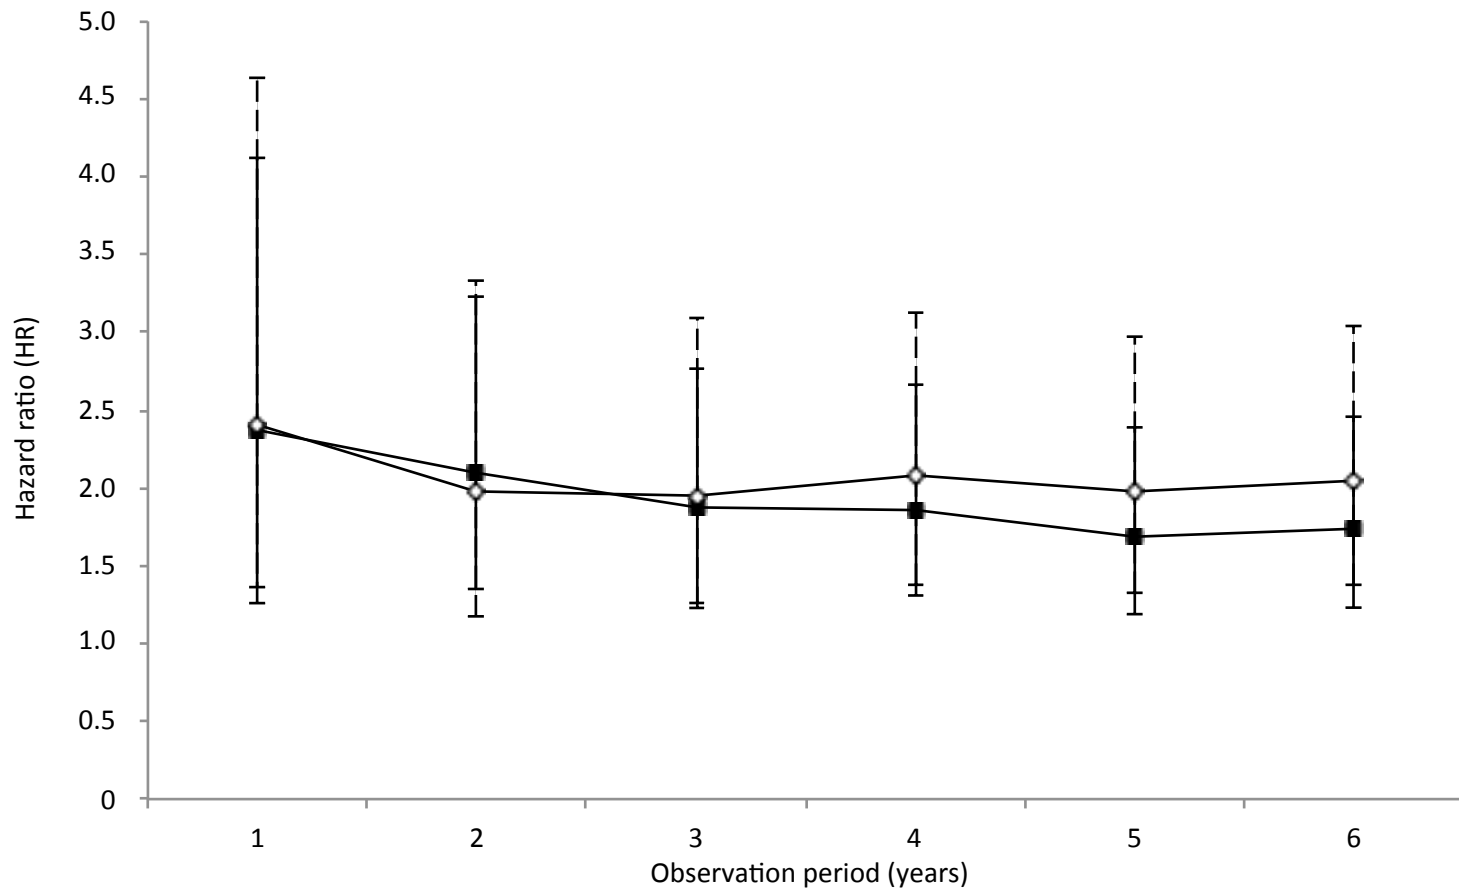

■ HR for mild anemia

◇ HR for moderate to severe anemia

2.37

2.09

1.87

1.86

1.69

1.74

2.42

1.98

1.95

2.07

1.98

2.05

**Supplementary Material Figure S1.** Hazard ratios (HR) for patients with AMI and anemia for increasing observation periods

Reference: Non-anemia: Hemoglobin (Hb) concentration of  $\geq 12$  g/dL in women, Hb concentration of  $\geq 13$  g/dL in men.

Mild anemia: Hb concentration of 11 g/dL to  $<12$  g/dL in women, Hb concentration of 11 g/dL to  $<13$  g/dL in men.

Moderate to severe anemia: Moderate to severe anemia: Hb concentration of  $<11$  g/dL in women and men.

95% Confidence intervals (CI) are represented by vertical lines above and below the HR estimates; 95% CI for mild anemia: dashed line; 95% CI for moderate to severe anemia: continuous line.
